# Supplementary material for: Geochemical studies on rock varnish and petroglyphs in the Owens and Rose Valleys, California
Source: PubMed Central journal article supplement (PMC7405993; doi:10.1371/journal.pone.0235421), 2020-08-05
Supplement: pone.0235421.s001.pdf [file pone.0235421.s001.pdf]

**S1 Table. Factors other than time known to influence varnish growth on petroglyphs.**

|                            |                                                                                                                                                                                                                                                                                                 |
|----------------------------|-------------------------------------------------------------------------------------------------------------------------------------------------------------------------------------------------------------------------------------------------------------------------------------------------|
| Climate and microclimate   | Moisture: There is a maximum growth rate at intermediate aridity. Both, hyperarid and humid conditions prevent and/or reverse varnish growth. Repeated moistening by dew, fog, drizzle, etc. enhances growth. Enhanced moisture in canyons or dry wash beds can locally enhance varnish growth. |
|                            | Temperature: Can affect weathering and oxidation rates, as well as microbial activity.                                                                                                                                                                                                          |
|                            | Wind: High winds can lead to aeolian erosion of varnish. Cold-air drainage is important in steep terrain.                                                                                                                                                                                       |
|                            | Exposure: Erosion, dust deposition, and surface moisture are influenced by cardinal orientation and inclination of the rock surface, as well as by small-scale topography.                                                                                                                      |
|                            | Surface runoff: Water running off over cliff edges can strongly enhance varnish growth, often resulting in obvious streaking. Shielding by overhanging cliffs or other factors producing rain shadow can reduce varnish growth.                                                                 |
| Substrate characteristics  | Stability: Resistance of rock substrate against weathering and erosion facilitates formation of a thick and long-lived varnish.                                                                                                                                                                 |
|                            | Roughness and porosity: A rough and porous surface can retain dust and moisture better than a smooth one, facilitating varnish development. An effect of thermal conductivity of the host rock is also possible.                                                                                |
|                            | Microtopography: Small depressions on upper surfaces of boulders (microbasins) retain dust and moisture and promote thick and layered varnish.                                                                                                                                                  |
|                            | Iron mineral content of the substrate rock may affect initial varnish growth by catalysis.                                                                                                                                                                                                      |
| Geochemical variables      | Physicochemical conditions: Varnish formation only occurs in a limited range of pH and Eh. Biogenic organic acids can dissolve varnish.                                                                                                                                                         |
|                            | Dust flux: Amount and composition of deposited dust regulate the supply of Mn and other trace elements.                                                                                                                                                                                         |
|                            | Air pollution: Especially in urban and near-urban conditions, trace metal supply by air pollution can strongly enhance varnish growth.                                                                                                                                                          |
| Microbiology               | The amount and species composition of the microbial community on the rock surface can affect both varnish formation and weathering. Microcolonial fungi can dissolve varnish.                                                                                                                   |
| Petroglyph-specific issues | Residual varnish: If the original varnish was not completely removed during the creation of the petroglyph, residual varnish can bias the measurements causing spurious regrowth estimates.                                                                                                     |
|                            | Reworking: Petroglyphs are sometimes reworked at later times, resulting in less apparent regrowth.                                                                                                                                                                                              |
|                            | Change in growth rate with time: Evidence suggests that varnish grows more rapidly right after petroglyph creation and eventually comes to a slowdown and halt.                                                                                                                                 |
|                            | Change in surface characteristics: Petroglyph creation by abrasion or pecking changes the surface roughness and texture, influencing varnish growth rate                                                                                                                                        |
