# Supplementary material for: Geochemical studies on rock varnish and petroglyphs in the Owens and Rose Valleys, California
Source: PubMed Central journal article supplement (PMC7405993; doi:10.1371/journal.pone.0235421), 2020-08-05
Supplement: pone.0235421.s002.pdf [file pone.0235421.s002.pdf]

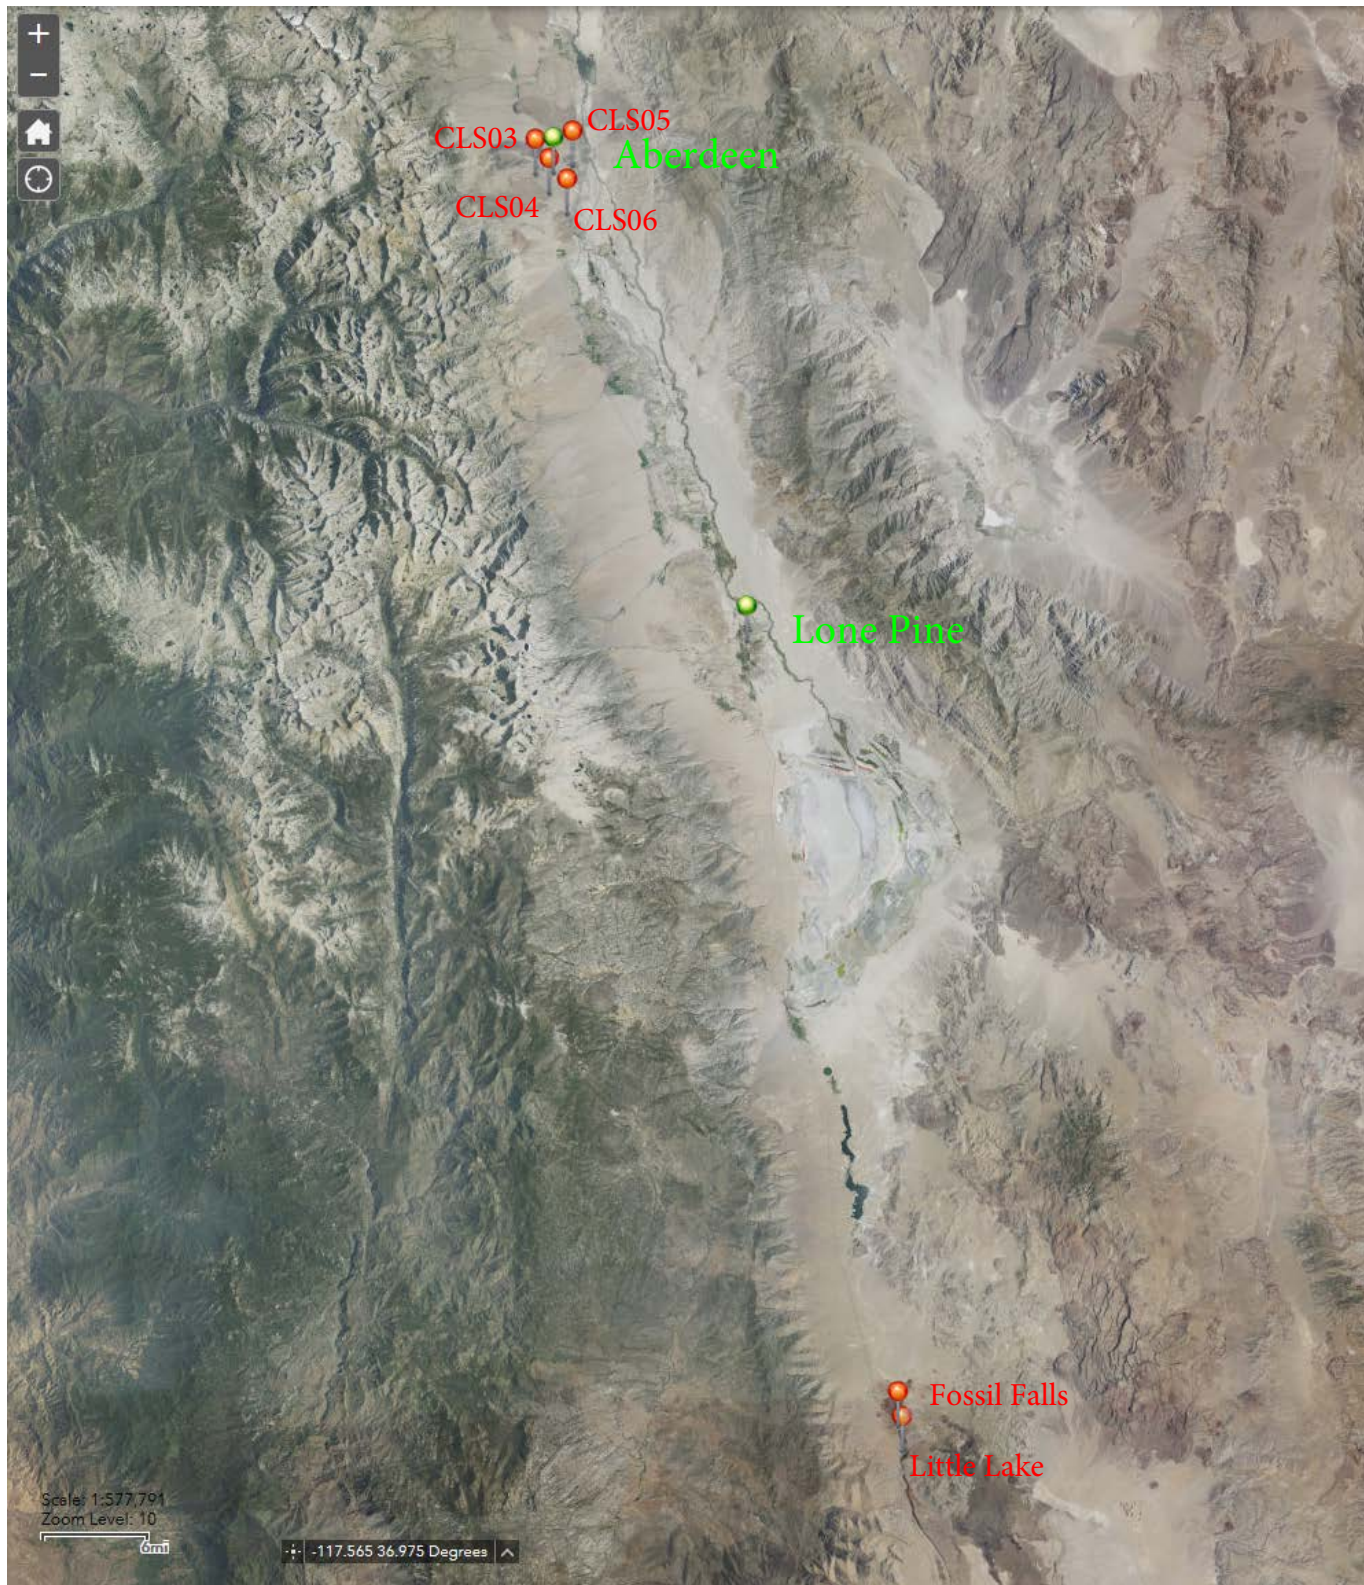

S2 Figure. Overview map of the study area in Owens and Rose Valleys. (Map services and data available from U.S. Geological Survey, National Geospatial Program.)
