# Supplementary material for: Geochemical studies on rock varnish and petroglyphs in the Owens and Rose Valleys, California
Source: PubMed Central journal article supplement (PMC7405993; doi:10.1371/journal.pone.0235421), 2020-08-05
Supplement: pone.0235421.s004.pdf [file pone.0235421.s004.pdf]

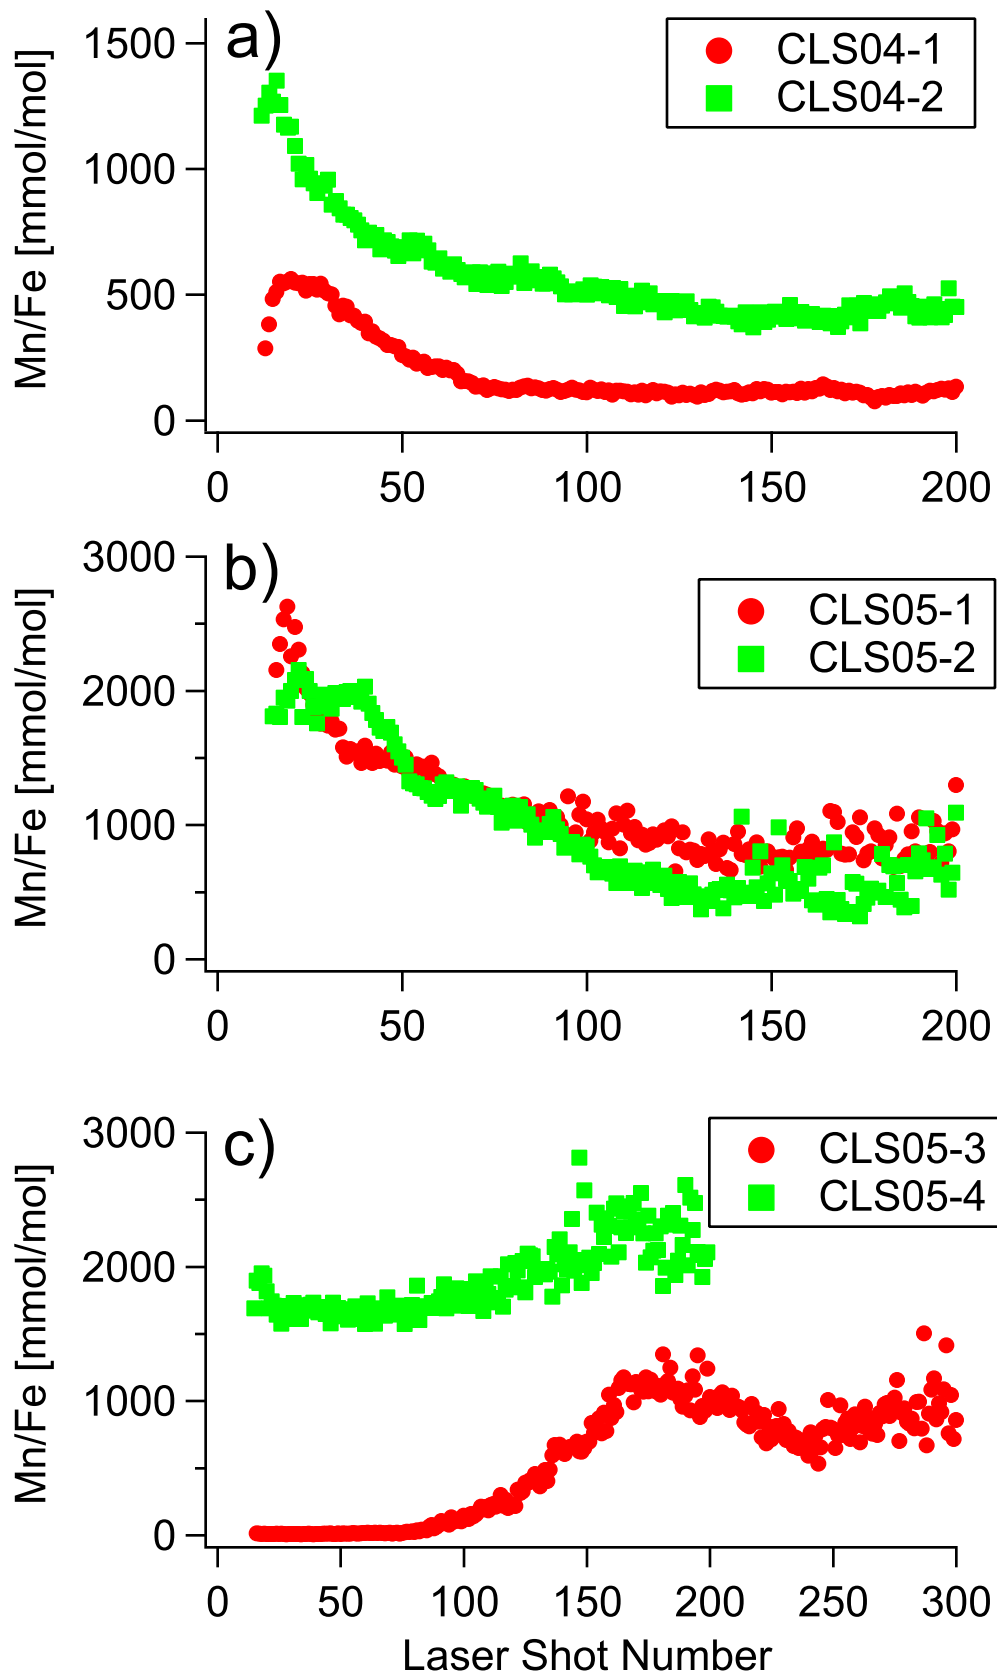

**S4 Figure. fs-LA-ICPMS spot measurement profiles on rock varnish samples.** The x-axis represents successive laser shots on the same spot. Each laser shot corresponds to a depth increment of about 50-100 nm.
