# Supplementary material for: Geochemical studies on rock varnish and petroglyphs in the Owens and Rose Valleys, California
Source: PubMed Central journal article supplement (PMC7405993; doi:10.1371/journal.pone.0235421), 2020-08-05
Supplement: pone.0235421.s005.pdf [file pone.0235421.s005.pdf]

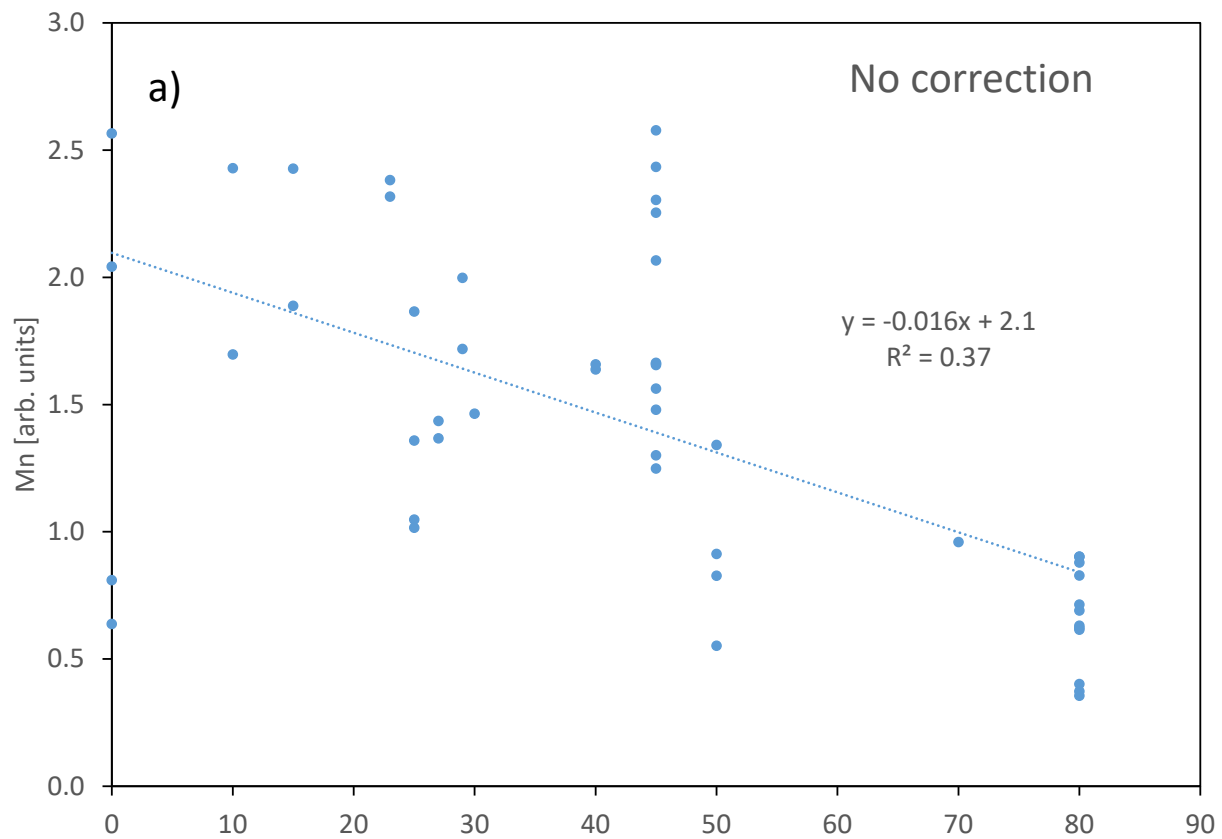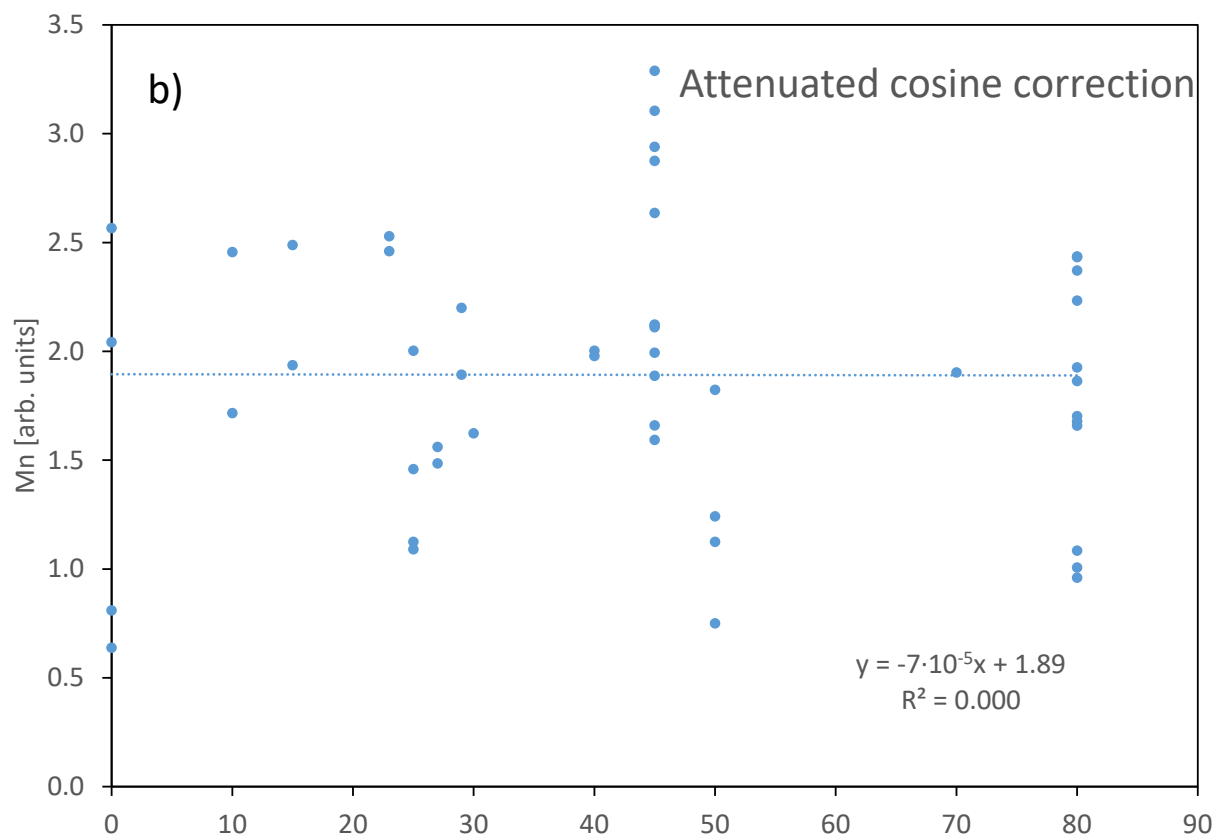

**S5 Figure. Mn surface density versus surface inclination.** a) without inclination correction, b) with correction using the "attenuated cosine" correction equation (see text).
