# Supplementary material for: Geochemical studies on rock varnish and petroglyphs in the Owens and Rose Valleys, California
Source: PubMed Central journal article supplement (PMC7405993; doi:10.1371/journal.pone.0235421), 2020-08-05
Supplement: pone.0235421.s006.pdf [file pone.0235421.s006.pdf]

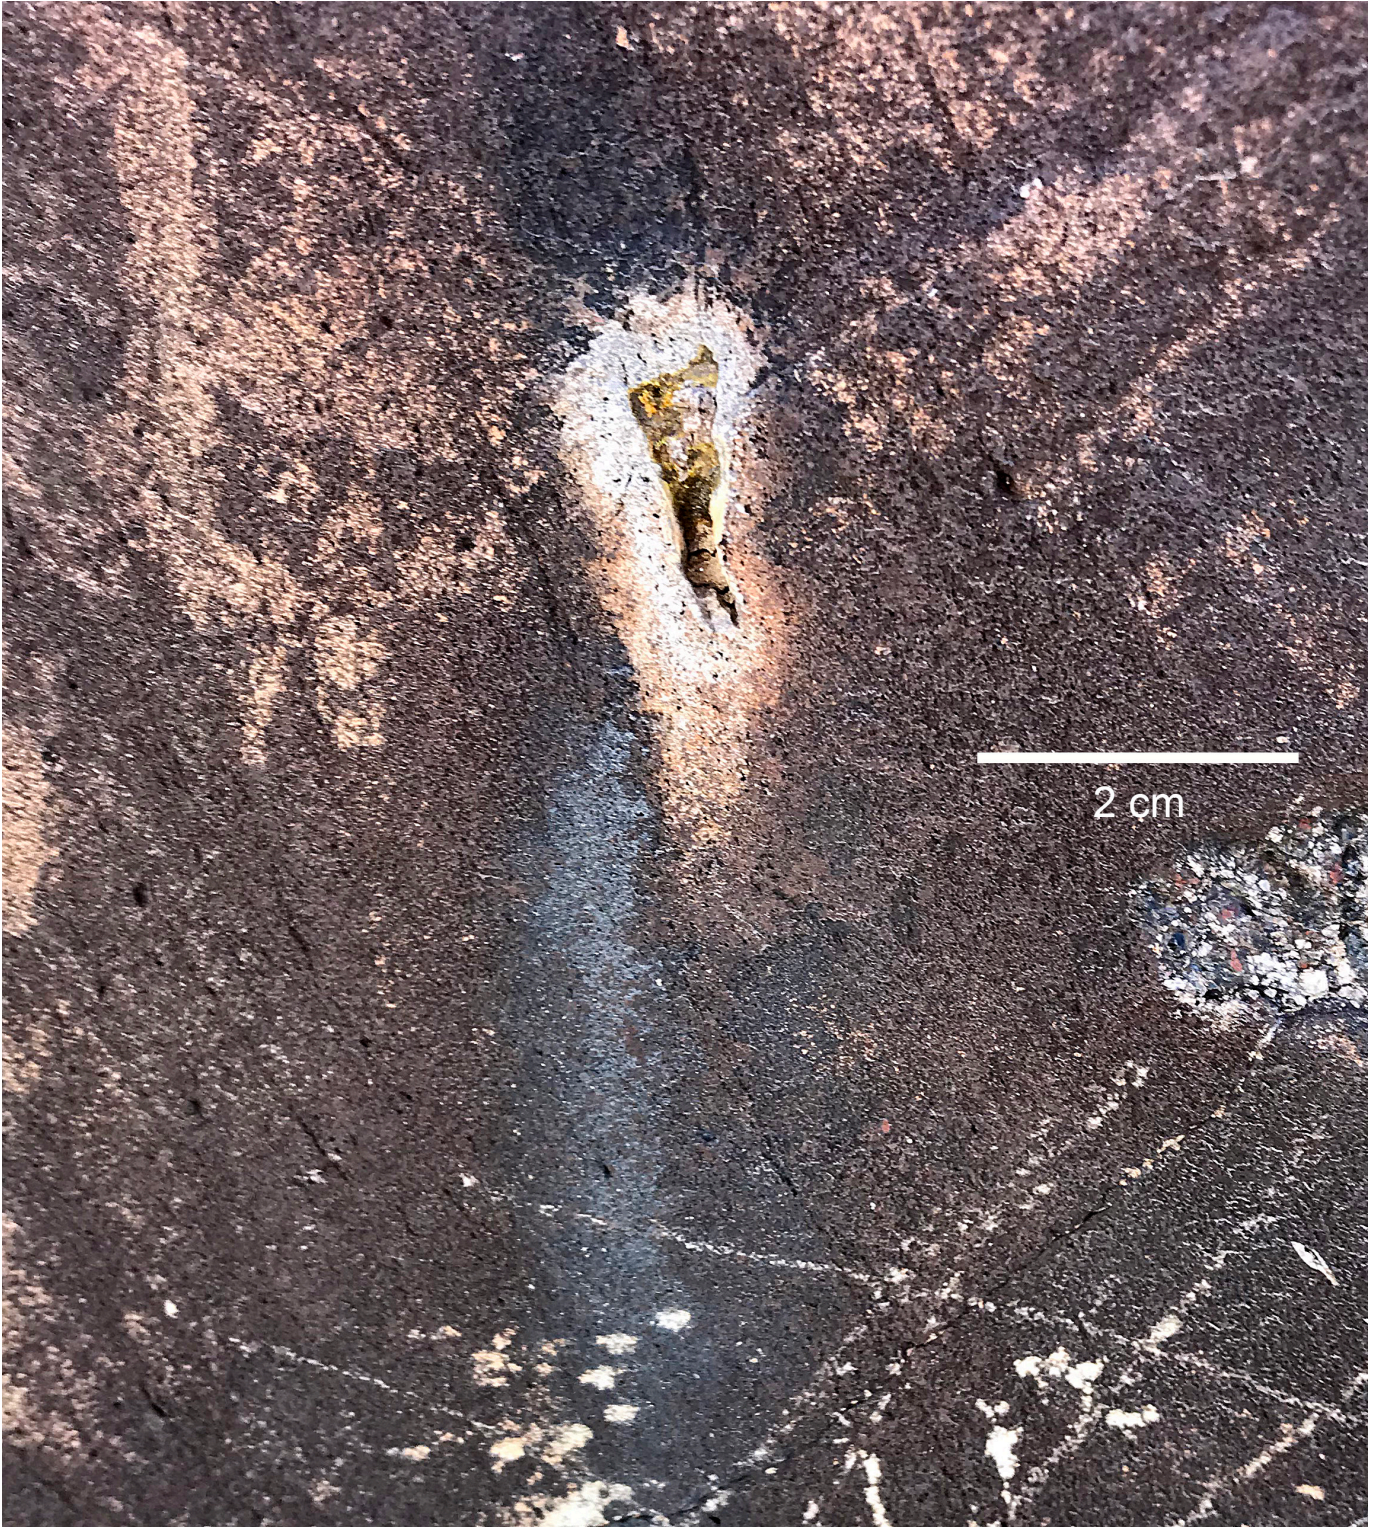

**S6 Figure: Image of the varnish around a large olivine phenocryst on a near-vertical rock surface at Little Lake.**
