# Supplementary material for: Geochemical studies on rock varnish and petroglyphs in the Owens and Rose Valleys, California
Source: PubMed Central journal article supplement (PMC7405993; doi:10.1371/journal.pone.0235421), 2020-08-05

Formula Bar

|    | A        | B                      | C | D | E | F | G | H | I | J |
|----|----------|------------------------|---|---|---|---|---|---|---|---|
| 1  | age (ka) | randbetween (0-20)/age |   |   |   |   |   |   |   |   |
| 2  | 1        | 8                      |   |   |   |   |   |   |   |   |
| 3  | 10       | 0.5                    |   |   |   |   |   |   |   |   |
| 4  | 20       | 0.85                   |   |   |   |   |   |   |   |   |
| 5  | 30       | 0.56666667             |   |   |   |   |   |   |   |   |
| 6  | 40       | 0.1                    |   |   |   |   |   |   |   |   |
| 7  | 50       | 0.36                   |   |   |   |   |   |   |   |   |
| 8  | 60       | 0.26666667             |   |   |   |   |   |   |   |   |
| 9  | 70       | 0.15714286             |   |   |   |   |   |   |   |   |
| 10 | 80       | 0.175                  |   |   |   |   |   |   |   |   |
| 11 | 90       | 0.16666667             |   |   |   |   |   |   |   |   |
| 12 | 100      | 0.04                   |   |   |   |   |   |   |   |   |
| 13 | 110      | 0.01818182             |   |   |   |   |   |   |   |   |
| 14 | 120      | 0.06666667             |   |   |   |   |   |   |   |   |
| 15 | 130      | 0.03846154             |   |   |   |   |   |   |   |   |
| 16 | 140      | 0.00714286             |   |   |   |   |   |   |   |   |

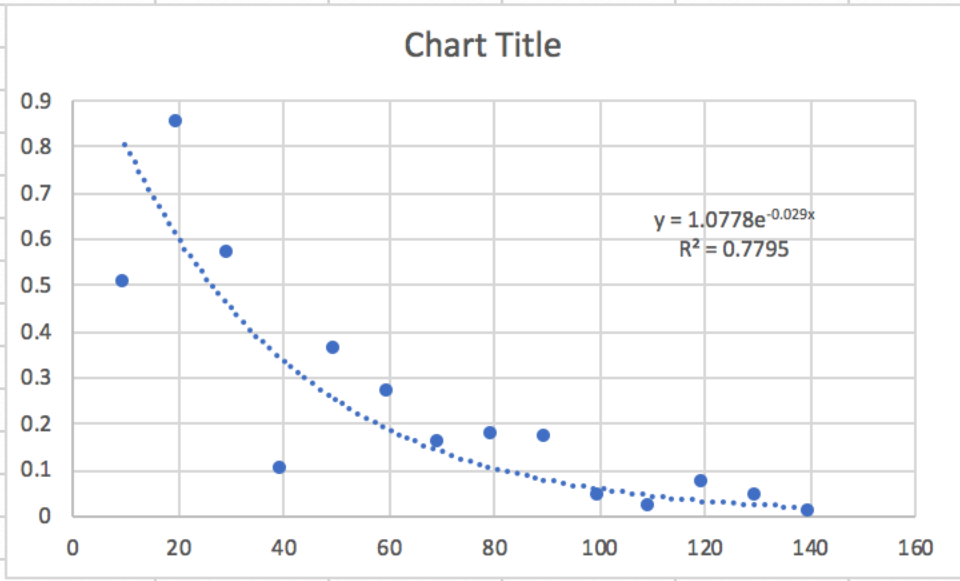

Supplement: pone.0235421.s010.pdf [file pone.0235421.s010.pdf]
